# Supplementary material for: Lower Calcium/Phosphorus Ratio is Associated with the Severity of Deformity in Patients with Scoliosis
Source: Research Square preprint supplement (doi:10.21203/rs.3.rs-8748126/v1), 2026-02-05
Supplement: Supplementary file 1 [file f0d752d61c83e90a0e7aaf31.docx]

***Supplementary Material***

| **Supplementary Table 1 Collinearity assessment using VIF** | | | |
| --- | --- | --- | --- |
| **Variables** | **VIF** | **Variables** | **VIF** |
| Marital status | 1.756 | CYC-C | 1.660 |
| Hypertension | 1.932 | Ca:P Ratio | 1.500 |
| Diabetes | 1.477 | Mg | 1.300 |
| Gender | 1.588 | ALP | 1.323 |
| Education level | 1.535 | TG | 1.913 |
| Age | 3.012 | TC | 4.480 |
| Lumbar BMD | 1.767 | HDL-C | 1.809 |
| UREA | 2.130 | eGFR | 4.906 |
| **CREA** | **5.067** | BMI | 1.348 |
| FBG | 1.246 | LDL-C | 4.520 |
| UA | 1.753 |  |  |
